# Supplementary material for: Converting carbon black into an efficient and multi-site ORR electrocatalyst: the importance of bottom-up construction parameters
Source: Royal Society of Chemistry journal article supplement (doi:10.1039/d3nr04244h), 2023-01-01
Supplement: d3nr04244h1.pdf [file d3nr04244h1.pdf]

**Supplementary Information**

**Converting carbon black into efficient and multi-site ORR electrocatalyst:  
The importance of bottom-up construction parameters**

Rui S. Ribeiro<sup>\*abc</sup>, Marc Florent<sup>a</sup>, Juan J. Delgado<sup>de</sup>, M. Fernando R. Pereira<sup>bc</sup>, Teresa J. Bandoz<sup>\*a</sup>

---

<sup>a</sup> Department of Chemistry and Biochemistry, The City College of The City University of New York, 160 Convent Avenue, New York, NY 10031, USA. E-mail: [tbandosz@ccny.cuny.edu](mailto:tbandosz@ccny.cuny.edu) (T.J. Bandoz).

<sup>b</sup> LSRE-LCM - Laboratory of Separation and Reaction Engineering – Laboratory of Catalysis and Materials, Faculty of Engineering, University of Porto, Rua Dr. Roberto Frias, 4200-465 Porto, Portugal. E-mail: [rsribeiro@fe.up.pt](mailto:rsribeiro@fe.up.pt) (R.S. Ribeiro).

<sup>c</sup> ALICE - Associate Laboratory in Chemical Engineering, Faculty of Engineering, University of Porto, Rua Dr. Roberto Frias, 4200-465 Porto, Portugal.

<sup>d</sup> IMEYMAT: Institute of Research on Electron Microscopy and Materials, University of Cádiz, E11510 Puerto Real, Cádiz, Spain.

<sup>e</sup> Departamento de Ciencia de Materiales, Ingeniería Metalúrgica y Química Inorgánica, University of Cádiz, E11510 Puerto Real, Cádiz, Spain.

## Text S1. Chemicals and materials

Carbon black – Black Pearls 2000 (BP) was obtained from Cabot. Melamine (99 wt.%) and thiourea (99 wt.%) were purchased from Alfa-Aesar. Iron (II) acetate and a platinum benchmark catalyst (Pt/C; 20 wt.% of Pt on graphitized carbon) were purchased from Aldrich. D-(+)-glucose monohydrate (for biochemistry), urea (99.5wt.%), iron (III) nitrate nonahydrate (98 wt.%), iron (II) chloride tetrahydrate (99 wt.%), cobalt (II) acetate (98 wt.%), and nickel (II) acetate hydrate (99 wt.%) were obtained from Calbiochem, Amresco, Sigma-Aldrich, Fisher, Spectrum, and Beantown Chemical, respectively. Potassium hydroxide (1.0 mol L<sup>-1</sup>) was purchased from Thermo Scientific. Nafion D-520 dispersion (5 wt.% in water and 1-propanol) was purchased from Beantown Chemical. Ethanol (99.5 % v/v) was purchased from Terrace Packaging and Chemicals. Methanol (99.8 wt.%) was obtained from Alfa Aesar. Distilled water was used throughout this work.

## Text S2. Detailed description of the characterization techniques

N<sub>2</sub> adsorption-desorption isotherms obtained at – 196 °C (performed in a Micromeritics ASAP 2020 apparatus) were used to derive textural properties of the samples tested. Before analysis, carbons (ca. 0.1 g) were outgassed at 120 °C overnight. The specific surface area ( $S_{\text{BET}}$ ) was calculated by the Brunauer–Emmett–Teller (BET) method using adsorption data collected in relative pressures ( $P/P_0$ ) between 0.05 and 0.30. The total pore volume ( $V_{\text{Total}}$ ) was determined from the amount adsorbed at a relative pressure of 0.98. Pore size distribution and volume of micropores ( $V_{\text{Micro}}$ ) were obtained using a two-dimensional non-local density functional theory (2-NLDFT), assuming pore wall heterogeneity.<sup>1</sup>

Thermogravimetric analysis (TGA) was performed on a TA Instruments SDT Q600 thermal analyzer upon heating the samples (ca. 10 mg) from 50 to 1000 °C at 5 °C min<sup>-1</sup> under an oxidative (air) flow. The ash content was determined as the residual mass obtained at 1000 °C. Bulk Fe content was estimated assuming that all the Fe in the sample was oxidized to Fe<sub>2</sub>O<sub>3</sub> after heating to 1000 °C, as described in Eq. S1.  $M_{\text{Fe}}$  and  $M_{\text{Fe}_2\text{O}_3}$  represent the molar mass of Fe and Fe<sub>2</sub>O<sub>3</sub>, respectively.

$$\text{Bulk Fe/ wt.\%} = \text{Ash content/ wt.\%} \times \frac{2 M_{\text{Fe}}}{M_{\text{Fe}_2\text{O}_3}} \quad (\text{S1})$$

X-ray photoelectron spectroscopy (XPS) analysis was performed on a Physical Electronics PHI 5000 VersaProbe II spectrometer using a Al K $\alpha$  X-ray source (1486.6 eV), powered at 15 kV (90 W). For data analysis, the charge correction was based on the C 1s peak (285 eV). Spectra modelling was performed using Gaussian-Lorentzian peak shape fitting after Shirley background subtraction, using XPSPEAK4.1 software.

The characterization of the samples at the sub-nanometric scale was mainly performed by high-resolution high angle annular dark field scanning transmission electron microscopy (HR-HAADF-STEM) imaging using a double aberration corrected (AC), as well as monochromated, FEI Titan<sup>3</sup> Themis 60–300 microscope operated at 200 kV. We also conducted elemental mapping using energy dispersive X-ray spectroscopy (EDS) to determine the distribution of Fe on Fe<sub>0.06, low G</sub>-N@BP. ImageJ software was used to estimate the diameter of the Fe particles at the surface of Fe<sub>0.06</sub>-N@BP and Fe<sub>0.06, low G</sub>-N@BP (at least 200 counts were performed for each sample).

## Text S3. Detailed description of the procedures used for electrochemical measurements and characterization

A conventional three-electrode configuration was used in all electrochemical experiments. The measurements were carried out on a WaveDriver 40 bipotentiostat (Pine Research Instrumentation). A rotating ring-disk electrode (RRDE) with a glassy carbon disk and a gold ring electrode (5 mm diameter and 25.6% collection efficiency) was used as a working electrode; Ag/AgCl (4 mol L<sup>-1</sup> KCl) and a graphite rod were a reference and counter electrode, respectively.

The potential collected with reference to Ag/AgCl was converted to a reversible hydrogen electrode (RHE) potential ( $E_{\text{RHE}}$ ) as described in Eq. S2, where  $E_{\text{Ag/AgCl}}$  is the experimental working potential and  $E_{\text{Ag/AgCl}}^0$  is the potential of the Ag/AgCl reference electrode vs. RHE as provided by the manufacturer (0.199 V at 20 °C).

$$E_{\text{RHE}} = E_{\text{Ag/AgCl}} + 0.059 \text{ pH} + E_{\text{Ag/AgCl}}^0 \quad (\text{S2})$$

KOH (0.1 mol L<sup>-1</sup>) saturated with N<sub>2</sub> or O<sub>2</sub> (by bubbling the corresponding gas for 60 min) was employed as an electrolyte solution (room temperature = 20 °C) in all electrochemical experiments. Cyclic voltammetry (CV) measurements were performed without rotation, at a scan rate of 5 mV s<sup>-1</sup>; linear sweep voltammetry (LSV) measurements were performed at a fixed scan rate of 5 mV s<sup>-1</sup>, with rotation speeds of 0, 400, 800, 1200, 1600, and 2000 rpm; and chronoamperometry measurements were performed at constant potential (0.4 V vs. RHE) and rotation speed (1600 rpm), either for 24 h (to study electrocatalytic stability), or for 20 min having 2.5 mL of methanol rapidly spiked after ca. 10 min of the experiment (to study electrocatalyst resistance to methanol cross-over). The N<sub>2</sub>/O<sub>2</sub> was supplied above the electrolyte, in the headspace of the

electrochemical cell, during the CV and LSV measurements. On the contrary, chronoamperometry tests were performed with O<sub>2</sub> bubbling in the electrolyte during the whole experiments.

In the case of LSV, the experimental current was obtained by subtracting the current obtained in N<sub>2</sub>-saturated electrolyte from that obtained in O<sub>2</sub>-saturated electrolyte, allowing to determine the following ORR performance indicators: potential needed to achieve a current density of 0.1 mA cm<sup>-2</sup> ( $E_{0.1}$ ); onset potential ( $E_{\text{onset}}$ ; defined as the minimum of the second derivative of the current density-potential curve);<sup>2</sup> half-wave potential ( $E_{1/2}$ ; defined as the maximum of the first derivative of the current density-potential curve); limiting current density ( $J_L$ ; defined as the current density at 0.15 V vs. RHE); hydrogen peroxide (H<sub>2</sub>O<sub>2</sub>) formation (H<sub>2</sub>O<sub>2</sub> (%); Eq. S3); and average number of electrons transferred during the ORR ( $n_e$ ; Eq. S4).  $i_R$  and  $i_D$  are the ring and disc currents obtained in the LSV experiments performed at 1600 rpm, respectively; and  $N$  is a collection efficiency as provided by the supplier (25.6%).

$$\text{H}_2\text{O}_2 \text{ (%) } = \frac{2 \times \frac{i_R}{N}}{i_D + \frac{i_R}{N}} \times 100 \quad (\text{S3})$$

$$n_e = 4 \times \frac{i_D}{i_D + \frac{i_R}{N}} \quad (\text{S4})$$

Tafel plots were obtained from LSV data (1600 rpm) in the kinetically controlled region nearby  $E_{\text{onset}}$  and slopes were determined by linear fitting. The exchange current density ( $J_0$ ) was calculated from the Tafel plots, as the point where the y-intercept equals the O<sub>2</sub>/H<sub>2</sub>O standard reduction potential ( $E^{\text{O}_2/\text{H}_2\text{O}} = 1.229 \text{ V vs. RHE}$ ).

**Table S1** Summary of oxygen reduction reaction (ORR) results obtained on carbon black electrocatalysts prepared with different iron precursors: potential needed to achieve a current density of 0.1 mA cm<sup>-2</sup> ( $E_{0.1}$ ), onset potential ( $E_{\text{onset}}$ ), half-wave potential ( $E_{1/2}$ ), limiting current density ( $J_L$ ), hydrogen peroxide (H<sub>2</sub>O<sub>2</sub>) formation, number of electrons transferred ( $n_e$ ), and stability<sup>a</sup>.

| Sample                  | $E_{0.1}/\text{V}$ | $E_{\text{onset}}/\text{V}$ | $E_{1/2}/\text{V}$ | $J_L^b/\text{mA cm}^{-2}$ | H <sub>2</sub> O <sub>2</sub> <sup>c</sup> / % | $n_e^c$ | Stability <sup>d</sup> / % |
|-------------------------|--------------------|-----------------------------|--------------------|---------------------------|------------------------------------------------|---------|----------------------------|
| BP                      | 0.796              | 0.772                       | 0.727              | 3.480                     | 32.1                                           | 3.36    | 76.3                       |
| Fe <sub>Nit</sub> -N@BP | 0.935              | 0.887                       | 0.832              | 4.317                     | 7.3                                            | 3.85    | 88.2                       |
| Fe <sub>Cl</sub> -N@BP  | 0.938              | 0.892                       | 0.837              | 4.434                     | 6.8                                            | 3.86    | 87.4                       |
| Fe-N@BP                 | 0.973              | 0.917                       | 0.852              | 4.361                     | 4.9                                            | 3.90    | 90.7                       |
| Pt/C                    | 0.985              | 0.882                       | 0.847              | 4.657                     | 2.2                                            | 3.96    | 98.0                       |

<sup>a</sup> All data refers to experiments performed at 1600 rpm; <sup>b</sup> Calculated at 0.15 V vs. RHE; <sup>c</sup> Calculated at 0.4 V vs. RHE; <sup>d</sup> Calculated after 24 h at 0.4 V vs. RHE.

## Text S4. Brief description of ORR mechanisms

Oxygen reduction reaction (ORR) in alkaline media can proceed through the direct four-electron pathway (Eq. S5) or the indirect two-electron pathway (Eq. S6); the former being preferred. Regarding the latter, subsequent reduction (Eq. S7) or disproportionation (Eq. S8) of peroxide ions is needed.<sup>3</sup>

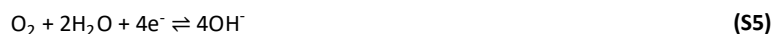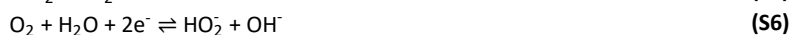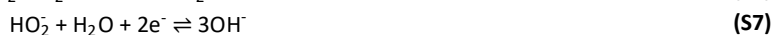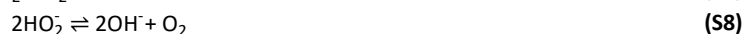

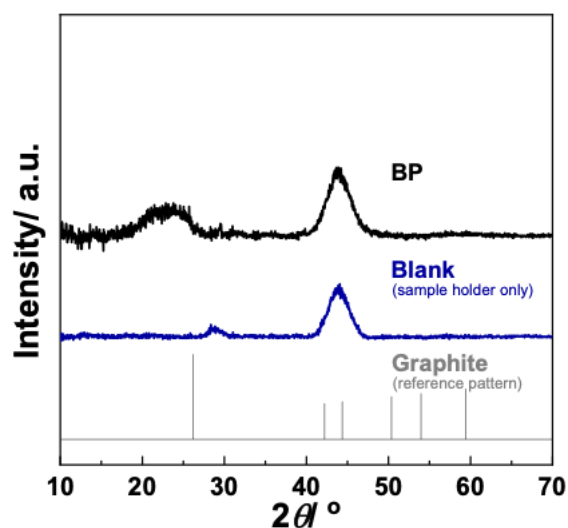

**Figure S1** X-ray diffraction (XRD) patterns of BP, sample holder (blank) in the absence of a sample, and standard reference pattern of graphite (crystallography open database code: 1200017).

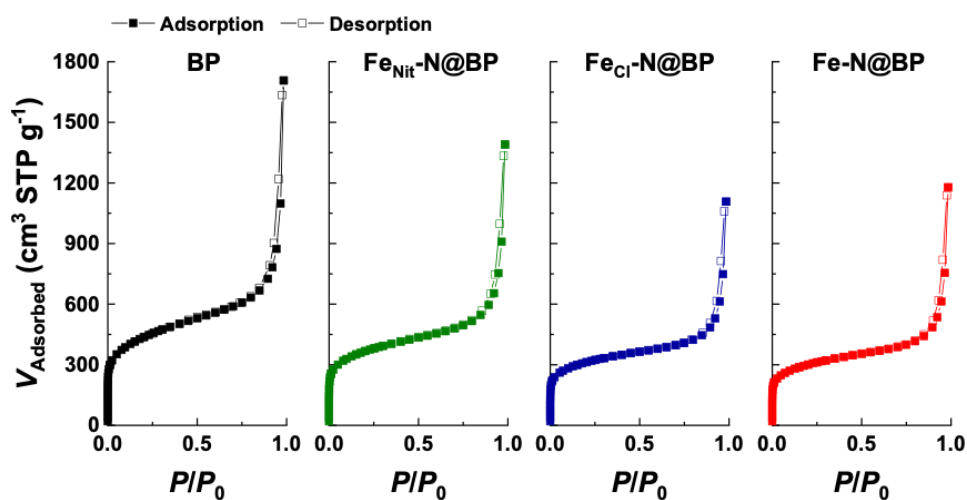

**Figure S2** N<sub>2</sub> adsorption-desorption isotherms measured at -196 °C on the carbon black electrocatalysts prepared with different iron precursors.

**Table S2** Summary of the textural properties of carbon black electrocatalysts prepared with different iron precursors: specific surface area ( $S_{\text{BET}}$ ), micropore volume ( $V_{\text{micro}}$ ), total pore volume ( $V_{\text{total}}$ ), and  $V_{\text{micro}}/V_{\text{total}}$  ratio determined from the N<sub>2</sub> adsorption-desorption isotherms given in Figure S2.

| Sample                  | $S_{\text{BET}}/\text{m}^2\text{g}^{-1}$ | $V_{\text{micro}}/\text{cm}^3\text{g}^{-1}$ | $V_{\text{total}}/\text{cm}^3\text{g}^{-1}$ | $V_{\text{micro}}/V_{\text{total}}$ |
|-------------------------|------------------------------------------|---------------------------------------------|---------------------------------------------|-------------------------------------|
| BP                      | 1550                                     | 0.480                                       | 2.641                                       | 0.182                               |
| Fe <sub>NIT</sub> -N@BP | 1308                                     | 0.420                                       | 2.150                                       | 0.195                               |
| Fe <sub>Cl</sub> -N@BP  | 1117                                     | 0.369                                       | 1.713                                       | 0.216                               |
| Fe-N@BP                 | 1075                                     | 0.348                                       | 1.822                                       | 0.191                               |

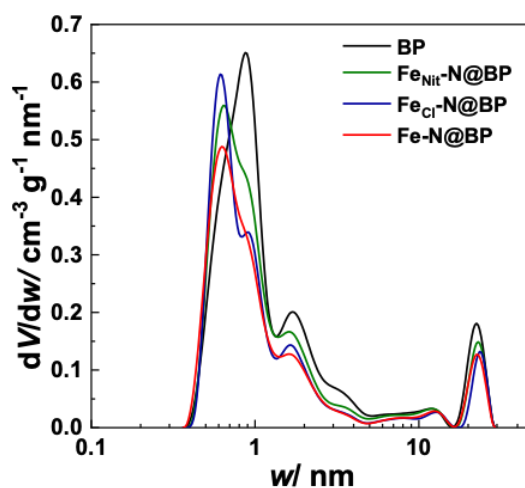

**Figure S3** Pore size distributions of the carbon black electrocatalysts prepared with different iron precursors, as determined from the N<sub>2</sub> adsorption isotherms given in Figure S2.

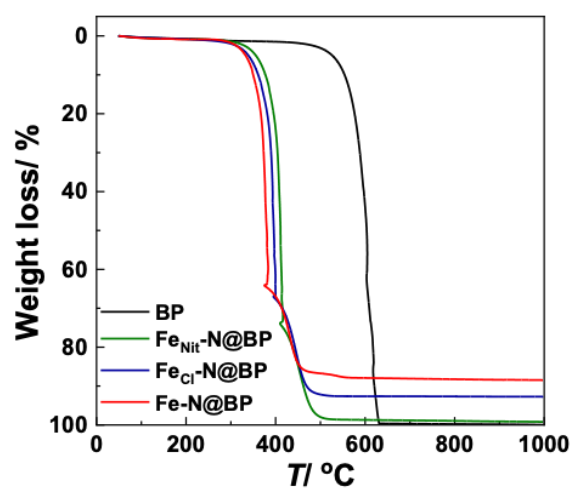

**Figure S4** Thermogravimetric analysis (TGA) results collected in an air atmosphere of the carbon black electrocatalysts prepared with different iron precursors.

**Table S3** Ash and Fe contents of carbon black electrocatalysts prepared with different iron precursors, as determined by thermogravimetric analysis (TGA).

| Sample                  | Ashes/<br>wt. % | Bulk Fe/<br>wt. % |
|-------------------------|-----------------|-------------------|
| BP                      | < 0.1           | -                 |
| Fe <sub>NIT</sub> -N@BP | 0.8             | 0.6               |
| Fe <sub>Cl</sub> -N@BP  | 7.3             | 5.1               |
| Fe-N@BP                 | 11.5            | 8.0               |

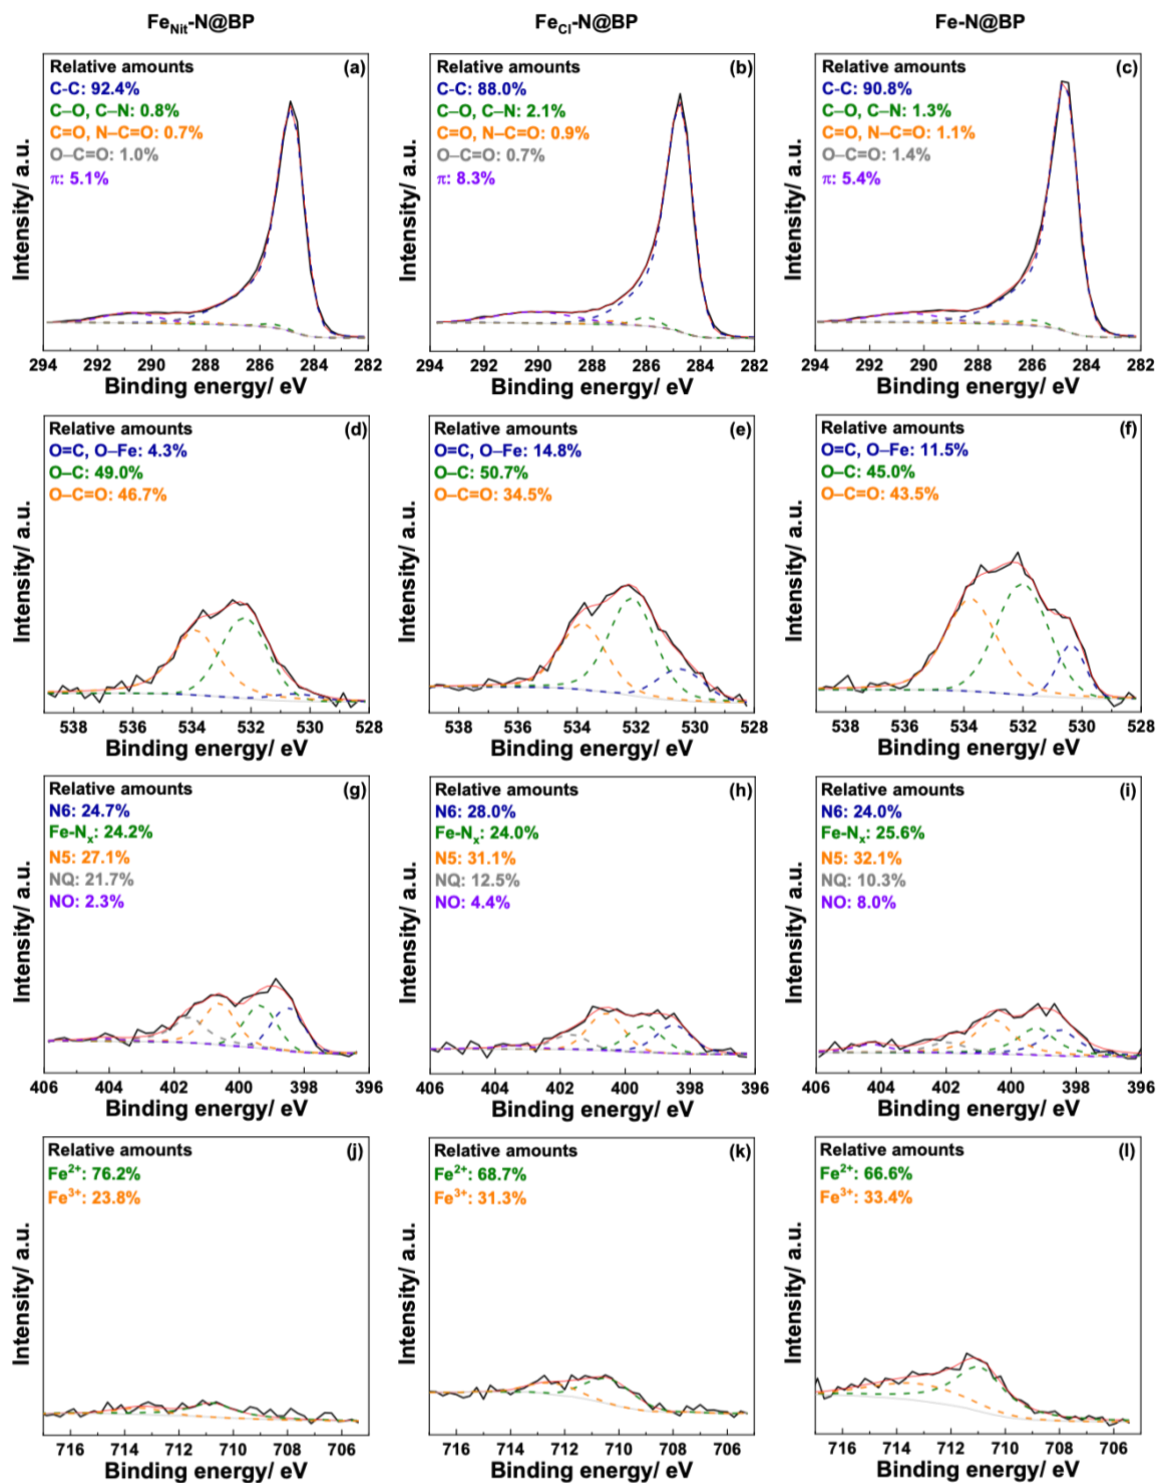

**Figure S5** Detailed core energy level spectra of the (a-c) C 1s, (d-f) O 1s, (g-i) N 1s, and (j-l) Fe 2p<sub>3/2</sub> regions of (a, d, g, j) FeNIT-N@BP, (b, e, h, k) FeCl-N@BP, and (c, f, i, l) Fe-N@BP. N6, N5, NQ, and NO represent N-pyridinic, N-pyrrolic, N-quaternary, and N-oxidized species, respectively.

**Table S4** Surface concentration of C, O, N, and Fe determined from the X-ray photoelectron spectroscopy (XPS) analysis of carbon black electrocatalysts prepared with different iron precursors.

| Sample                  | Surface concentration/ at.% |     |     |     | Surface concentration/ wt.% |     |     |     |
|-------------------------|-----------------------------|-----|-----|-----|-----------------------------|-----|-----|-----|
|                         | C                           | O   | N   | Fe  | C                           | O   | N   | Fe  |
| Fe <sup>Nit</sup> -N@BP | 95.2                        | 2.6 | 2.1 | 0.1 | 93.7                        | 3.4 | 2.4 | 0.5 |
| Fe <sup>Cl</sup> -N@BP  | 95.3                        | 3.0 | 1.4 | 0.3 | 93.1                        | 3.9 | 1.7 | 1.3 |
| Fe-N@BP                 | 94.4                        | 3.9 | 1.4 | 0.3 | 91.9                        | 5.0 | 1.6 | 1.5 |

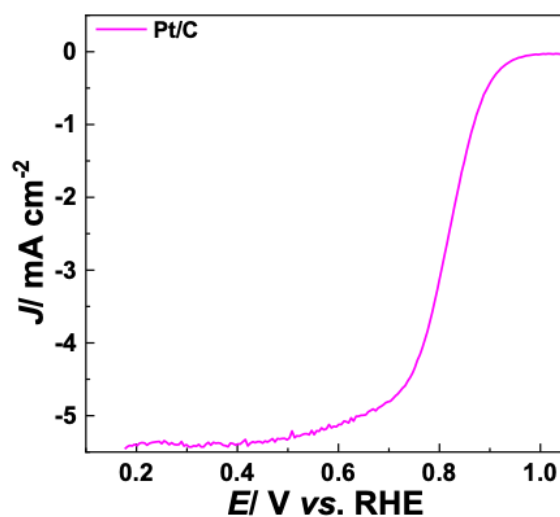

**Figure S6** Linear sweep voltammetry (LSV) curve obtained on commercial Pt/C at a load of 0.33 mg cm<sup>-2</sup>. Experiment carried out in O<sub>2</sub>-saturated 0.1 mol L<sup>-1</sup> KOH at 1600 rpm.

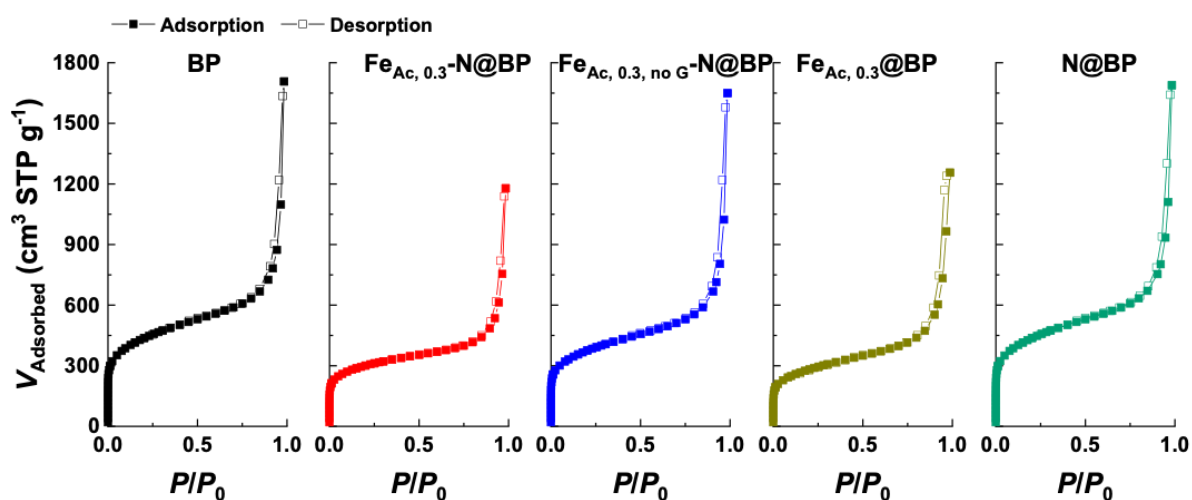

**Figure S7** N<sub>2</sub> adsorption-desorption isotherms measured at -196 °C on the carbon black electrocatalysts prepared to study the role of the synthesis precursors.

**Table S5** Summary of the textural properties of carbon black electrocatalysts prepared to study the role of the synthesis precursors: specific surface area ( $S_{\text{BET}}$ ), micropore volume ( $V_{\text{micro}}$ ), total pore volume ( $V_{\text{total}}$ ), and  $V_{\text{micro}}/V_{\text{total}}$  ratio determined from the  $\text{N}_2$  adsorption-desorption isotherms given in Figure S7.

| Sample                         | $S_{\text{BET}}/\text{m}^2\text{g}^{-1}$ | $V_{\text{micro}}/\text{cm}^3\text{g}^{-1}$ | $V_{\text{total}}/\text{cm}^3\text{g}^{-1}$ | $V_{\text{micro}}/V_{\text{total}}$ |
|--------------------------------|------------------------------------------|---------------------------------------------|---------------------------------------------|-------------------------------------|
| BP                             | 1550                                     | 0.480                                       | 2.641                                       | 0.182                               |
| Fe-N@BP                        | 1075                                     | 0.348                                       | 1.822                                       | 0.191                               |
| $\text{Fe}_{\text{no G-N@BP}}$ | 1344                                     | 0.406                                       | 2.552                                       | 0.159                               |
| Fe@BP                          | 1010                                     | 0.287                                       | 1.943                                       | 0.148                               |
| N@BP                           | 1550                                     | 0.482                                       | 2.613                                       | 0.185                               |

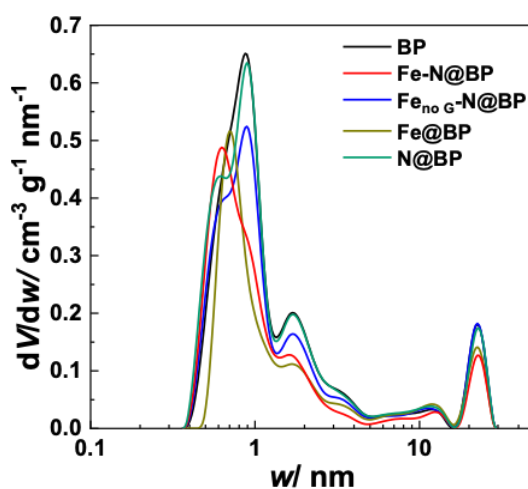

**Figure S8** Pore size distributions of the carbon black electrocatalysts prepared to study the role of the synthesis precursors, as determined from the  $\text{N}_2$  adsorption isotherms given in Figure S7.

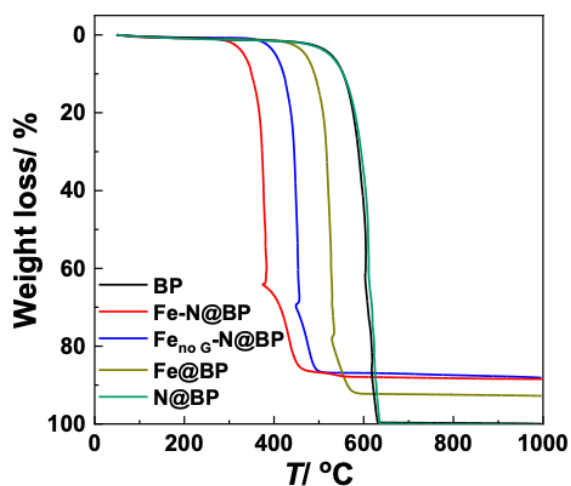

**Figure S9** Thermogravimetric analysis (TGA) results collected in an air atmosphere of the carbon black electrocatalysts prepared to study the role of the synthesis precursors.

**Table S6** Ash and Fe contents of carbon black electrocatalysts prepared to study the role of the synthesis precursors, as determined by the thermogravimetric analysis (TGA).

| Sample                   | Ashes/<br>wt. % | Bulk Fe/<br>wt. % |
|--------------------------|-----------------|-------------------|
| BP                       | < 0.1           | -                 |
| Fe-N@BP                  | 11.5            | 8.0               |
| Fe <sub>no G</sub> -N@BP | 11.9            | 8.3               |
| Fe@BP                    | 7.2             | 5.0               |
| N@BP                     | < 0.1           | -                 |

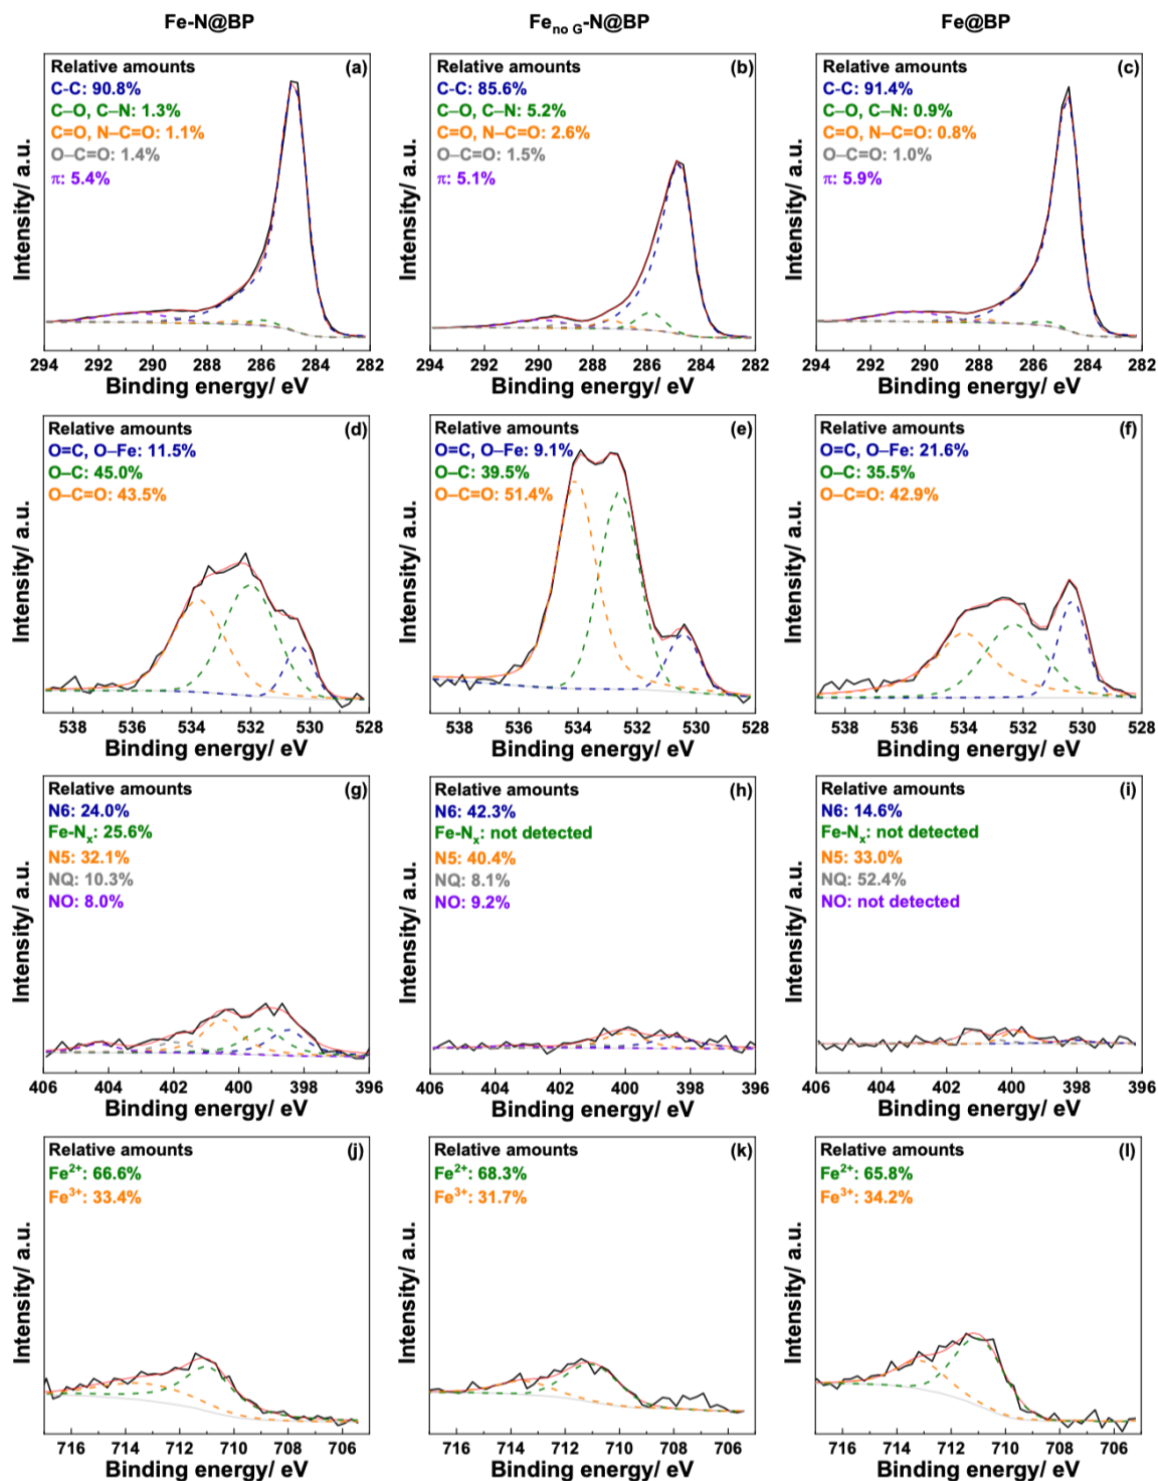

**Figure S10** Detailed core energy level spectra of the (a-c) C 1s, (d-f) O 1s, (g-i) N 1s, and (j-l) Fe 2p<sub>3/2</sub> regions of (a, d, g, j) Fe-N@BP, (b, e, h, k) Fe<sub>no G</sub>-N@BP, and (c, f, i, l) Fe@BP. N6, N5, NQ, and NO represent N-pyridinic, N-pyrrolic, N-quaternary, and N-oxidized species, respectively.

**Table S7** Surface concentration of C, O, N, and Fe determined from the X-ray photoelectron spectroscopy (XPS) analysis of carbon black electrocatalysts prepared to study the role of the synthesis precursors.

| Sample                   | Surface concentration/ at.% |     |     |     | Surface concentration/ wt.% |     |     |     |
|--------------------------|-----------------------------|-----|-----|-----|-----------------------------|-----|-----|-----|
|                          | C                           | O   | N   | Fe  | C                           | O   | N   | Fe  |
| Fe-N@BP                  | 94.4                        | 3.9 | 1.4 | 0.3 | 91.9                        | 5.0 | 1.6 | 1.5 |
| Fe <sub>no G</sub> -N@BP | 91.6                        | 7.5 | 0.5 | 0.4 | 88.1                        | 9.6 | 0.6 | 1.7 |
| Fe@BP                    | 95.9                        | 3.5 | 0.1 | 0.5 | 93.1                        | 4.5 | 0.1 | 2.2 |

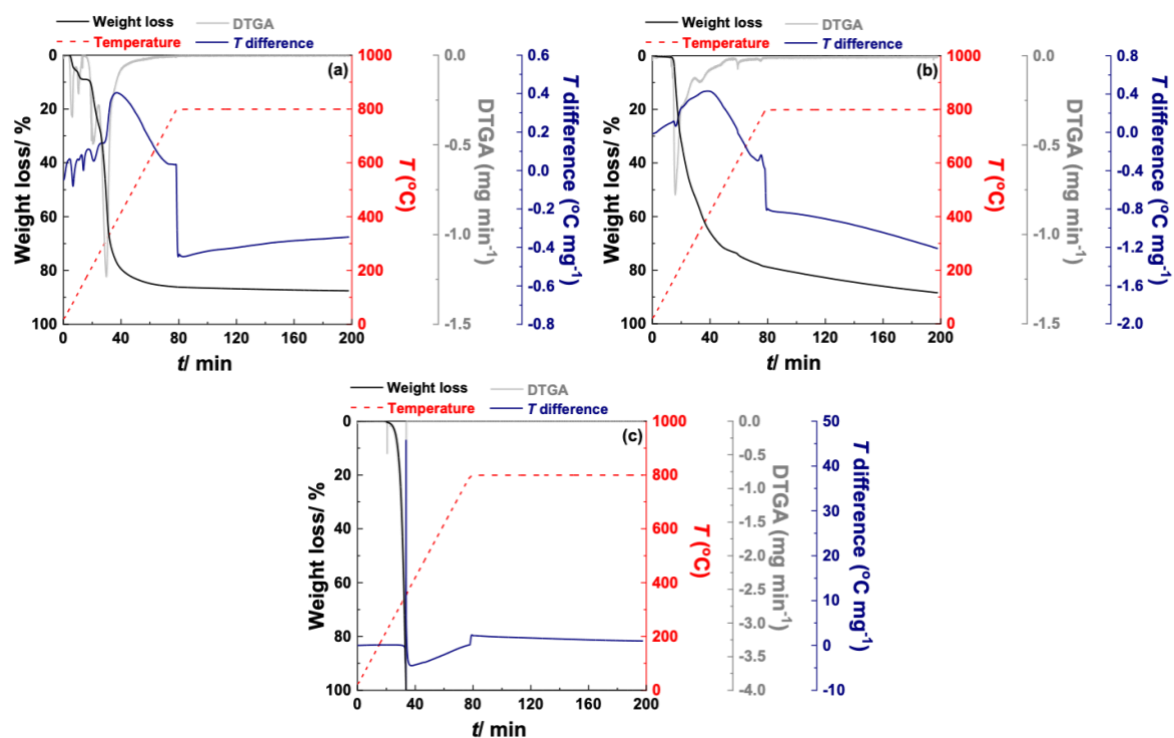

**Figure S11** Results of the thermogravimetric analysis (TGA) carried out in argon to mimic the conditions used in the thermal treatment employed during the synthesis of the carbon black electrocatalysts: (a) glucose, (b) a mixture containing iron (II) acetate and glucose, and (c) melamine.

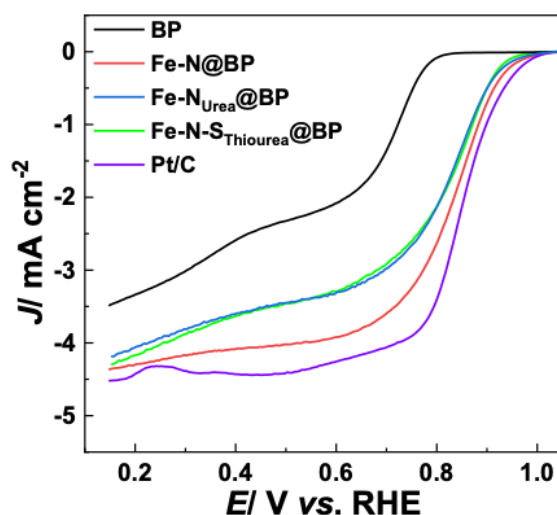

**Figure S12** Linear sweep voltammetry (LSV) curves of the carbon black electrocatalysts prepared with different precursors of heteroatoms, obtained in  $O_2$ -saturated  $0.1 \text{ mol L}^{-1} \text{ KOH}$  at 1600 rpm. Results obtained with commercial Pt/C are also given for comparison.

**Table S8** Summary of oxygen reduction reaction (ORR) activity obtained on carbon black electrocatalysts prepared with different precursors of heteroatoms: potential needed to achieve a current density of  $0.1 \text{ mA cm}^{-2}$  ( $E_{0.1}$ ), onset potential ( $E_{\text{onset}}$ ), half-wave potential ( $E_{1/2}$ ), limiting current density ( $J_L$ ), the % of hydrogen peroxide ( $H_2O_2$ ) formed, the number of electrons transferred ( $n_e$ ), and stability<sup>a</sup>.

| Sample                         | $E_{0.1}/\text{V}$ | $E_{\text{onset}}/\text{V}$ | $E_{1/2}/\text{V}$ | $J_L^b/\text{mA cm}^{-2}$ | $H_2O_2^c/\%$ | $n_e^c$ | Stability <sup>d</sup> /% |
|--------------------------------|--------------------|-----------------------------|--------------------|---------------------------|---------------|---------|---------------------------|
| Fe-N@BP                        | 0.973              | 0.917                       | 0.852              | 4.361                     | 4.9           | 3.90    | 90.7                      |
| Fe-N <sub>Urea</sub> @BP       | 0.960              | 0.902                       | 0.852              | 4.192                     | 4.0           | 3.92    | 81.3                      |
| Fe-N-S <sub>Thiourea</sub> @BP | 0.943              | 0.917                       | 0.867              | 4.315                     | 5.8           | 3.89    | 79.3                      |
| Pt/C                           | 0.985              | 0.882                       | 0.847              | 4.657                     | 2.2           | 3.96    | 98.0                      |

<sup>a</sup> All data refers to experiments performed at 1600 rpm; <sup>b</sup> Calculated at 0.15 V vs. RHE; <sup>c</sup> Calculated at 0.4 V vs. RHE; <sup>d</sup> Calculated after 24 h at 0.4 V vs. RHE.

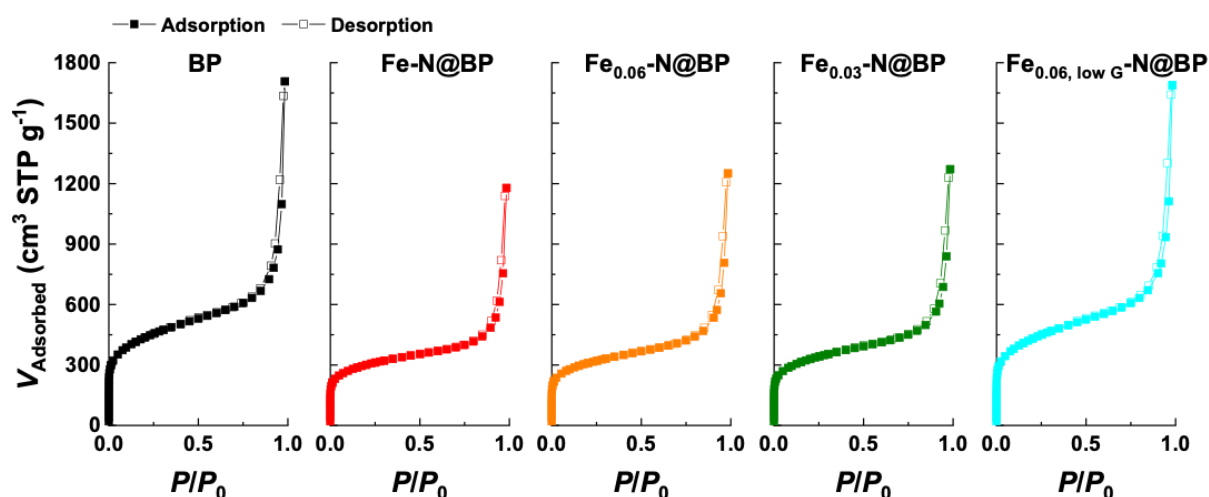

**Figure S13**  $N_2$  adsorption-desorption isotherms measured at  $-196^\circ\text{C}$  on the carbon black electrocatalysts prepared to study the effect of the Fe load.

**Table S9** Summary of the textural properties of carbon black electrocatalysts prepared to study the effect of the Fe load: specific surface area ( $S_{\text{BET}}$ ), micropore volume ( $V_{\text{micro}}$ ), total pore volume ( $V_{\text{total}}$ ), and  $V_{\text{micro}}/V_{\text{total}}$  ratio determined from the  $\text{N}_2$  adsorption-desorption isotherms given in Figure S13.

| Sample                                | $S_{\text{BET}}/\text{m}^2\text{g}^{-1}$ | $V_{\text{micro}}/\text{cm}^3\text{g}^{-1}$ | $V_{\text{total}}/\text{cm}^3\text{g}^{-1}$ | $V_{\text{micro}}/V_{\text{total}}$ |
|---------------------------------------|------------------------------------------|---------------------------------------------|---------------------------------------------|-------------------------------------|
| BP                                    | 1550                                     | 0.480                                       | 2.641                                       | 0.182                               |
| Fe-N@BP                               | 1075                                     | 0.348                                       | 1.822                                       | 0.191                               |
| $\text{Fe}_{0.06}\text{-N@BP}$        | 1103                                     | 0.352                                       | 1.934                                       | 0.182                               |
| $\text{Fe}_{0.03}\text{-N@BP}$        | 1174                                     | 0.372                                       | 1.967                                       | 0.189                               |
| $\text{Fe}_{0.06, \text{low G-N@BP}}$ | 1534                                     | 0.468                                       | 2.612                                       | 0.179                               |

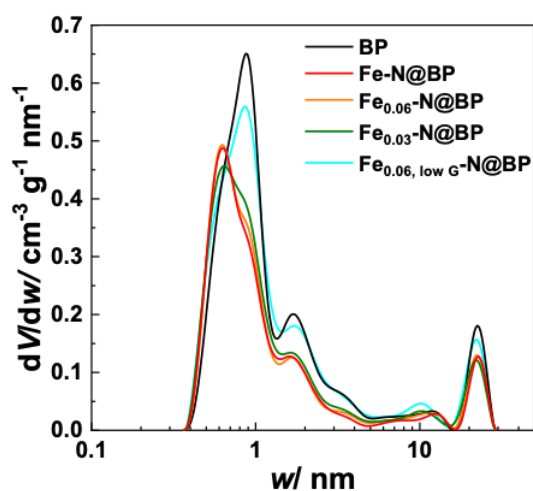

**Figure S14** Pore size distributions of the carbon black electrocatalysts prepared to study the effect of the Fe load, as determined from the  $\text{N}_2$  adsorption isotherms given in Figure S13.

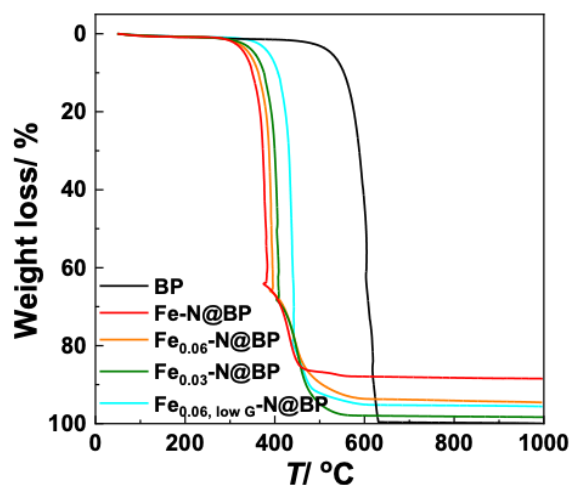

**Figure S15** Thermogravimetric analysis (TGA) results collected in an air atmosphere of the carbon black electrocatalysts prepared to study the effect of the Fe load.

**Table S10** Ash and Fe contents of the carbon black electrocatalysts prepared to study the effect of Fe load, as determined by the thermogravimetric analysis (TGA).

| Sample                          | Ashes/<br>wt. % | Bulk Fe/<br>wt. % |
|---------------------------------|-----------------|-------------------|
| BP                              | < 0.1           | -                 |
| Fe-N@BP                         | 11.5            | 8.0               |
| Fe <sub>0.06</sub> -N@BP        | 5.3             | 3.7               |
| Fe <sub>0.03</sub> -N @BP       | 1.7             | 1.2               |
| Fe <sub>0.06, low G</sub> -N@BP | 4.4             | 3.1               |

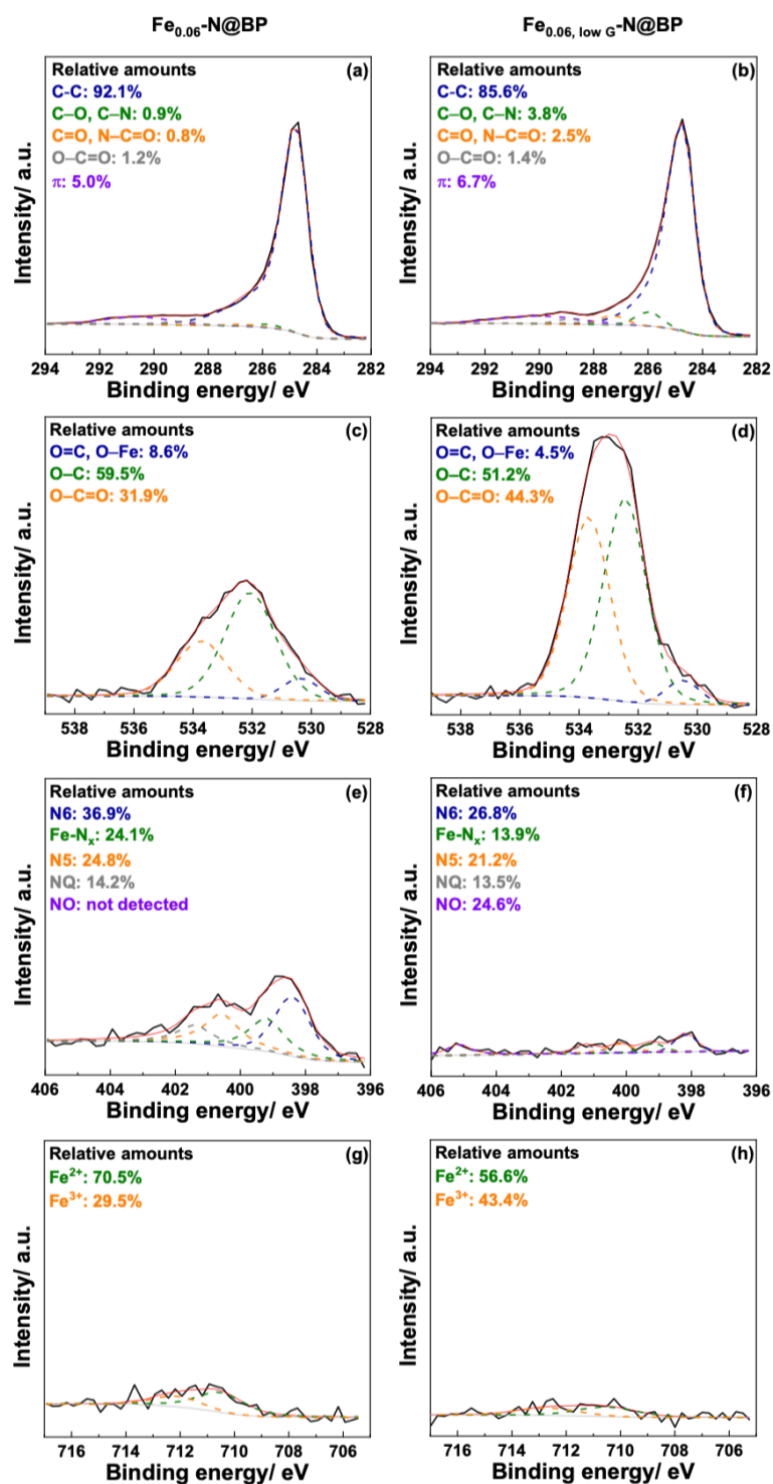

**Figure S16** Detailed core energy level spectra of the (a, b) C 1s, (c, d) O 1s, (e, f) N 1s, and (g, h) Fe 2p<sub>3/2</sub> regions of (a, c, e, g) Fe<sub>0.06</sub>-N@BP, (b, d, f, h) and Fe<sub>0.06, low G</sub>-N@BP. N6, N5, NQ, and NO represent N-pyridinic, N-pyrrolic, N-quaternary, and N-oxidized species, respectively.

**Table S11** Surface concentrations of C, O, N, and Fe determined from the X-ray photoelectron spectroscopy (XPS) analysis of the carbon black electrocatalysts prepared with different amounts of glucose.

| Sample                          | Surface concentration/ at.% |     |     |     | Surface concentration/ wt.% |     |     |     |
|---------------------------------|-----------------------------|-----|-----|-----|-----------------------------|-----|-----|-----|
|                                 | C                           | O   | N   | Fe  | C                           | O   | N   | Fe  |
| Fe-N@BP                         | 94.4                        | 3.9 | 1.4 | 0.3 | 91.9                        | 5.0 | 1.6 | 1.5 |
| Fe <sub>0.06</sub> -N@BP        | 93.8                        | 3.3 | 2.8 | 0.1 | 91.9                        | 4.3 | 3.2 | 0.6 |
| Fe <sub>0.06</sub> , low G-N@BP | 93.2                        | 6.3 | 0.4 | 0.1 | 90.9                        | 8.2 | 0.4 | 0.5 |

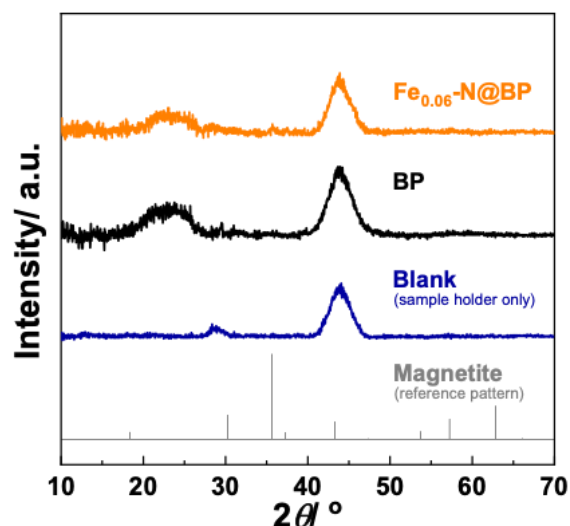

**Figure S17** X-ray diffraction (XRD) patterns of Fe<sub>0.06</sub>-N@BP, BP, sample holder (blank) in the absence of sample, and standard reference pattern of magnetite (crystallography open database code: 9005840).

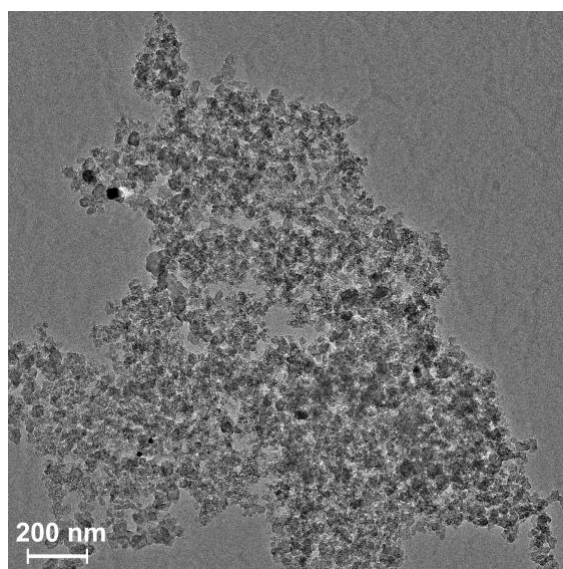

**Figure S18** Transmission electron microscopy (TEM) image of Fe<sub>0.06</sub>-N@BP.

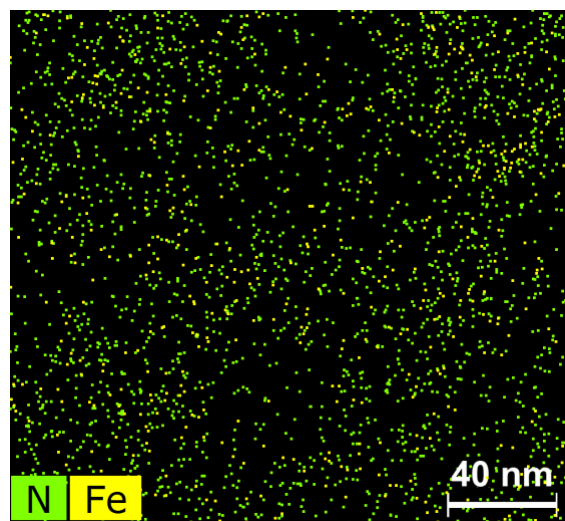

**Figure S19** Overlapping of N and Fe energy-dispersive X-ray spectroscopy (EDS) elemental maps of  $\text{Fe}_{0.06}\text{-N@BP}$ .

**Table S12** 10 latest studies reporting oxygen reduction reaction on carbon materials enriched with Fe-N-C active sites<sup>a</sup>.

| Authors                            | Catalyst                                                                                                                                                                                                                                                                                   |                                                                                                                                | ORR                                                                                                         |                                                                               |                                                                               |
|------------------------------------|--------------------------------------------------------------------------------------------------------------------------------------------------------------------------------------------------------------------------------------------------------------------------------------------|--------------------------------------------------------------------------------------------------------------------------------|-------------------------------------------------------------------------------------------------------------|-------------------------------------------------------------------------------|-------------------------------------------------------------------------------|
|                                    | Description                                                                                                                                                                                                                                                                                | Synthesis precursors                                                                                                           | Operating conditions                                                                                        | Activity                                                                      | Stability                                                                     |
| <b>This study</b>                  | <b>Carbon black enriched with Fe-N-C active sites</b><br><u>3 synthesis steps</u> : impregnation with iron and glucose; impregnation with melamine; thermal treatment at 800 °C                                                                                                            | Carbon black (Black Pearls 2000, Cabot), iron (II) acetate, glucose, and melamine                                              | Catalyst load = 0.25 mg cm <sup>-2</sup><br>Sweep rate = 5 mV s <sup>-1</sup><br>Rotation speed = 1600 rpm  | $E_{1/2}$ = 0.83 V<br>$J_L$ = 4.8 mA cm <sup>-2</sup><br>$n_e$ = 3.97         | 4% loss of $J$ after 24 h at 0.4 V vs. RHE                                    |
| Cui <i>et al.</i> <sup>4</sup>     | <b>Zeolitic imidazolate framework (ZIF) derived carbon enriched with Fe-N-C active sites</b><br><u>4 synthesis steps</u> : preparation of Fe-containing ZIF; impregnation with trithiocyanuric acid; thermal treatment at 900 °C; acidic washing                                           | 2-methylimidazole, zinc(II) nitrate, methanol, and iron(III) acetylacetonate                                                   | Catalyst load = 0.20 mg cm <sup>-2</sup><br>Sweep rate = 10 mV s <sup>-1</sup><br>Rotation speed = 1600 rpm | $E_{1/2}$ = 0.87 V<br>$J_L^b$ ≈ 6 mA cm <sup>-2</sup><br>$n_e$ not reported   | Not reported                                                                  |
| Bai <i>et al.</i> <sup>5</sup>     | <b>ZIF derived carbon doped with iron phthalocyanine</b><br><u>5 synthesis steps</u> : thermal polycondensation at 550 °C; preparation of ZIF; thermal treatment at 900 °C; impregnation with iron phthalocyanine; thermal treatment at 900 °C                                             | 2-methylimidazole, zinc(II) nitrate, urea, cyanoguanidine, methanol, iron phthalocyanine, isopropyl alcohol                    | Catalyst load = 0.40 mg cm <sup>-2</sup><br>Sweep rate = 5 mV s <sup>-1</sup><br>Rotation speed = 1600 rpm  | $E_{1/2}$ = 0.92 V<br>$J_L$ = 5.5 mA cm <sup>-2</sup><br>$n_e$ = 3.94         | $E_{1/2}$ loss of 9 mV after 5000 LSV cycles                                  |
| Mazzucato and Durante <sup>6</sup> | <b>Carbon black enriched with Fe-N-C active sites</b><br><u>8 synthesis steps</u> : synthesis of tris-1,10-phenanthroline iron(II) chloride; ball milling; thermal treatment at 900 °C; ball milling; acidic washing; ball milling; thermal treatment at 900 °C; ball milling              | Carbon black (XC72, Vulcan), 1,10-phenanthroline, iron(II) chloride, ethanol, diethyl ether, sulfuric acid                     | Catalyst load = 0.80 mg cm <sup>-2</sup><br>Sweep rate = 2 mV s <sup>-1</sup><br>Rotation speed = 1600 rpm  | $E_{1/2}$ = 0.75 V<br>$J_L^b$ ≈ 5.5 mA cm <sup>-2</sup><br>$n_e$ not reported | $E_{1/2}$ loss of 2 mV and 9% loss of $J$ at 0.6 V after 7000 LSV cycles      |
| Zhang <i>et al.</i> <sup>7</sup>   | <b>ZIF derived carbon enriched with Fe-N-C active sites</b><br><u>4 synthesis steps</u> : preparation of ZIF; impregnation with silica, iron, and sodium acetate; thermal treatment at 900 °C; acidic washing                                                                              | 2-methylimidazole, zinc(II) nitrate, iron(III) chloride, methanol, silica, sodium acetate                                      | Catalyst load = 0.50 mg cm <sup>-2</sup><br>Sweep rate = 10 mV s <sup>-1</sup><br>Rotation speed = 1600 rpm | $E_{1/2}$ = 0.84 V<br>$J_L^b$ ≈ 7 mA cm <sup>-2</sup><br>$n_e$ = 3.90         | Not reported; Negligible losses after 6000 CV cycles at 50 mV s <sup>-1</sup> |
| Sun <i>et al.</i> <sup>8</sup>     | <b>Polyimide derived carbon doped with iron phthalocyanine</b><br><u>5 synthesis steps</u> : Solvothermal synthesis of polyimide at 180 °C; thermal treatment at 900 °C; gas-phase functionalization with ammonia; impregnation with iron phthalocyanine; solvothermal treatment at 200 °C | Benzidine, ethanol, 3,3',4,4' - benzophenone tetracarboxylic dianhydride, ammonia, N, N-dimethylformamide, iron phthalocyanine | Catalyst load = 0.25 mg cm <sup>-2</sup><br>Sweep rate = 5 mV s <sup>-1</sup><br>Rotation speed = 1600 rpm  | $E_{1/2}$ = 0.90 V<br>$J_L^b$ ≈ 5.5 mA cm <sup>-2</sup><br>$n_e$ not reported | 9% loss of $J$ after 10 h at 0.6 V                                            |

<sup>a</sup> Data collected from Scopus on July 29, 2023, using the following query: “( TITLE-ABS-KEY ( oxygen AND reduction AND reaction ) AND TITLE-ABS-KEY ( fe-n-c ) )”. The titles and abstracts of those articles were screened for relevance. The 10 latest studies carried out in basic media (0.1 mol L<sup>-1</sup> KOH) and accessible by University of Porto were selected for full-text reading and data analysis/collection; <sup>b</sup> Approximate value collected from a Figure in the original publication (exact value not reported).

**Table S12** 10 latest studies reporting oxygen reduction reaction on carbon materials enriched with Fe-N-C active sites<sup>a</sup> (cont).

| Authors                          | Catalyst                                                                                                                                                                                                                             |                                                                                        | ORR                                                                                                         |                                                                                    |                                                                      |
|----------------------------------|--------------------------------------------------------------------------------------------------------------------------------------------------------------------------------------------------------------------------------------|----------------------------------------------------------------------------------------|-------------------------------------------------------------------------------------------------------------|------------------------------------------------------------------------------------|----------------------------------------------------------------------|
|                                  | Description                                                                                                                                                                                                                          | Synthesis precursors                                                                   | Operating conditions                                                                                        | Activity                                                                           | Stability                                                            |
| Wang <i>et al.</i> <sup>9</sup>  | <b>Pyrrole derived carbon enriched with Fe-N-C active sites</b><br><u>4 synthesis steps</u> : Impregnation of carbon precursors with iron; freeze-drying; thermal treatment at 900 °C; acidic washing                                | Pyrrole monomer, methyl orange, iron(III) chloride, sulfuric acid                      | Catalyst load = 0.60 mg cm <sup>-2</sup><br>Sweep rate not reported<br>Rotation speed not reported          | $E_{1/2}$ = 0.85 V<br>$J_L^b \approx 5.4$ mA cm <sup>-2</sup><br>$n_e = 3.96$      | $E_{1/2}$ loss of 7 mV after 5000 CV cycles (scan rate not reported) |
| Xu <i>et al.</i> <sup>10</sup>   | <b>ZIF derived carbon enriched with Fe-N-C active sites</b><br><u>2 synthesis steps</u> : preparation of Fe-containing ZIF; thermal treatment at 910 °C                                                                              | Cetyltrimethylammonium bromide, zinc(II) nitrate, iron(II) chloride, 2-methylimidazole | Catalyst load = 0.46 mg cm <sup>-2</sup><br>Sweep rate not reported<br>Rotation speed not reported          | $E_{1/2}$ = 0.90 V<br>$J_L^b \approx 6$ mA cm <sup>-2</sup><br>$n_e^b \approx 4$   | $E_{1/2}$ loss of 6 mV after 5000 LSV cycles                         |
| Shen <i>et al.</i> <sup>11</sup> | <b>Zinc-adenine derived carbon enriched with Fe-N-C active sites</b><br><u>2 synthesis steps</u> : Preparation of Fe-containing zinc-adenine precursor; thermal treatment at 1000 °C                                                 | Zinc(II) nitrate, iron(II) acetate, N, N-dimethylformamide, adenine                    | Catalyst load = 0.40 mg cm <sup>-2</sup><br>Sweep rate = 10 mV s <sup>-1</sup><br>Rotation speed = 1600 rpm | $E_{1/2}$ = 0.87 V<br>$J_L^b \approx 5.5$ mA cm <sup>-2</sup><br>$n_e = 3.96$      | 6.3% loss of $J$ after 20 h at an unreported fixed potential         |
| Wang <i>et al.</i> <sup>12</sup> | <b>Fullerene doped with iron tetraphenylporphyrin</b><br><u>3 synthesis steps</u> : Preparation of iron tetraphenylporphyrin; impregnation of fullerene through liquid-liquid interfacial precipitation; thermal treatment at 700 °C | Toluene, fullerene, tetraphenylporphyrin, iron(III) nitrate, propanol                  | Catalyst load = 1.00 mg cm <sup>-2</sup><br>Sweep rate = 10 mV s <sup>-1</sup><br>Rotation speed = 1600 rpm | $E_{1/2}$ = 0.88 V<br>$J_L^b \approx 5.5$ mA cm <sup>-2</sup><br>$n_e^b \approx 4$ | $\approx 15\%$ loss of $J^b$ after 28 h at 0.6 V vs. RHE             |
| Li <i>et al.</i> <sup>13</sup>   | <b>Carbonate derived carbon enriched with Fe-N-C active sites</b><br><u>4 synthesis steps</u> : Impregnation of carbon and nitrogen precursors with iron; hand milling; thermal treatment at 900 °C; acidic washing                  | Magnesium carbonate basic, ethanol, EDTA, iron(III) nitrate, hydrochloric acid         | Catalyst load = 0.25 mg cm <sup>-2</sup><br>Sweep rate = 10 mV s <sup>-1</sup><br>Rotation speed = 1600 rpm | $E_{1/2}$ = 0.87 V<br>$J_L^b \approx 5.6$ mA cm <sup>-2</sup><br>$n_e = 3.94$      | 10% loss of $J$ after 3.3 h at an unreported fixed potential         |

<sup>a</sup> Data collected from Scopus on July 29, 2023, using the following query: "( TITLE-ABS-KEY ( oxygen AND reduction AND reaction ) AND TITLE-ABS-KEY ( fe-n-c ) )". The titles and abstracts of those articles were screened for relevance. The 10 latest studies carried out in basic media (0.1 mol L<sup>-1</sup> KOH) and accessible by University of Porto were selected for full-text reading and data analysis/collection; <sup>b</sup> Approximate value collected from a Figure in the original publication (exact value not reported).

## References

1. J. Jagiello and J. P. Olivier, *Adsorption*, 2013, **19**, 777-783.
2. G. de Falco, M. Florent, A. De Rosa and T. J. Bandosz, *J. Colloid Interface Sci.*, 2021, **586**, 597-600.
3. X. Ge, A. Sumboja, D. Wu, T. An, B. Li, F. W. T. Goh, T. S. A. Hor, Y. Zong and Z. Liu, *ACS Catal.*, 2015, **5**, 4643-4667.
4. L. Cui, J. Hao, Y. Zhang, X. Kang, J. Zhang, X.-Z. Fu and J.-L. Luo, *J. Colloid Interface Sci.*, 2023, **650**, 603-612.
5. J. Bai, Y. Tang, C. Lin, X. Jiang, C. Zhang, H. Qin, Q. Zhou, M. Xiang, Y. Lian and Y. Deng, *J. Colloid Interface Sci.*, 2023, **648**, 440-447.
6. M. Mazzucato and C. Durante, *Electrochim. Acta*, 2023, **463**, 142801.
7. J. Zhang, Y. Chen, M. Tian, T. Yang, F. Zhang, G. Jia and X. Liu, *Chin. Chem. Lett.*, 2023, **34**, 107886.
8. Q. Sun, Z. Wang, M. Zhou, J. Li, R. Lu, Y. Wang, X. Liao and Y. Zhao, *Appl. Surf. Sci.*, 2023, **624**, 157154.
9. M. Wang, L. Wang, Q. Li, D. Wang, L. Yang, Y. Han, Y. Ren, G. Tian, X. Zheng, M. Ji, C. Zhu, L. Peng and G. I. N. Waterhouse, *Small*, 2023, **19**, 2300373.
10. H. Xu, L. Xiao, P. Yang, X. Lu, L. Liu, D. Wang, J. Zhang and M. An, *J. Colloid Interface Sci.*, 2023, **638**, 242-251.
11. M. Shen, J. Liu, J. Li, C. Duan, C. Xiong, W. Zhao, L. Dai, Q. Wang, H. Yang and Y. Ni, *Energy Storage Mater.*, 2023, **59**, 102790.
12. H. Wang, L. Cao, Y. Feng, J. Chen, W. Feng, T. Luo, Y. Hu, C. Yuan, Y. Zhao, Y. Zhao, K. Kajiyoshi, Y. Liu, Z. Li and J. Huang, *Chin. Chem. Lett.*, 2023, **34**, 107601.
13. S. Li, Y. Lv, S. Elam, X. Zhang, Z. Yang, X. Wu and J. Guo, *Molecules*, 2023, **28**, 2879.
